# Supplementary material
Source: PubMed Central journal article supplement (PMC3044360)
Supplement: 1016180108_pnas.201016180SI.pdf [file 1016180108_pnas.201016180SI.pdf]

# Supporting Information

Ghosh et al. 10.1073/pnas.1016180108

## SI Materials and Methods

**Cells, Bacterial Strains, and Reagents.** HT-29 and INT407 cells were maintained in DMEM supplemented with 10% FBS. THP-1 cells were grown in RPMI-1640 supplemented with 10% FBS and 0.05 mM 2-mercaptoethanol. All cells were purchased from American Type Culture Collection. *S. Typhi* Ty2 and CT18 and *S. Typhimurium* LT2 were gifts from J. Parkhill (Sanger Institute, Hinxton, United Kingdom). Other bacterial strains were provided by T. Ramamurty, S. Datta, and S. K. Niyogi (National Institute of Cholera and Enteric Diseases, Calcutta, India; Table S3). *Salmonella* and *Vibrio* strains were grown in Hektoen enteric agar and thiosulfate citrate bile salts sucrose agar (BD Difco), respectively, whereas other bacterial strains were maintained in Luria–Bertani agar at 37 °C. Liquid cultures were grown in Luria–Bertani broth (BD Difco). Plasmid pSIM6 and pQE60 were gifts from S. Datta (Institute of Post-Graduate Medical Education and Research, Calcutta, India) and D. Chakravorty (Indian Institute of Science, Bangalore, India), respectively. Oligonucleotides (Dataset S1) were custom-synthesized from IDT.

**Construction of *S. Typhi* Ty2-t2544 Mutant, Plasmid Curing, and Complementation.** Mutant bacteria were constructed by a technique called recombineering (1). Briefly, kanamycin-resistant cassette flanked by 50-bp regions of *t1831*, *t2544*, *t2769*, *tsaC*, and *pilS* genes of Ty2 and *STM0306* gene of LT2 were PCR-amplified from *E. coli* DY411 strain and transformed into the bacteria carrying pSIM6 plasmid that contains an ampicillin resistance cassette. Bacteria were incubated at 42 °C for 15 min to induce the expression of viral recombinase encoded by pSIM6. Isogenic mutants were selected from ampicillin–kanamycin plates. Mutant bacteria were cured of pSIM6 plasmid by growing 1,000-fold diluted cultures on LA plates without antibiotics. Ty2Δ*t2544* strain was complemented with *t2544* by transforming competent bacteria with pQE60-*t2544* plasmid.

**ELISA.** Microtiter wells containing bacteria or purified protein were incubated with the primary antibody PAS (Sigma) or RAS, respectively, followed by HRP-conjugated secondary antibody. Wells were developed by adding o-phenylenediamine dihydrochloride substrate (Sigma) and the enzyme reaction was analyzed by measuring OD at 492 nm.

**Adhesion Assay.** Adhesion of live bacteria or recombinant T2544 to cells and ECM was studied according to a method originally described by O’Ferrelly et al. (2). Briefly, monolayer cultures of HT-29/INT407/THP1 cells prefixed with 0.25% glutaraldehyde or ECM components coated on microtiter wells were blocked with 0.5% BSA and incubated with log-phase cultures of bacterial cells ( $10^6$  to  $10^8$ ) or purified T2544 for 1 h. Although cell monolayers were prefixed with glutaraldehyde, which is known to cross-link proteins, it did not contribute to T2544-mediated adhesion as cells were thoroughly washed before addition of bacteria. Specificity of the adhesion reaction and absence of glutaraldehyde during ECM attachment, as reflected by subsequent experiments, also rule out this possibility. For competitive binding assay, wells were preincubated with T2544 protein before addition of bacteria or the bacteria were preincubated with RAS before being added to the wells. After thorough washing, adherent bacteria were fixed with 0.3% formaldehyde. Cell or ECM binding by the bacteria or purified T2544 was studied by ELISA as described earlier.

**Confocal Microscopy.** Monolayer cultures of HT-29 cells (70% confluent) were grown on collagen-coated coverslips, fixed with glutaraldehyde, and incubated with GFP-tagged *S. Typhi* for 10 to 15 min. Cells were washed vigorously, fixed with 4% paraformaldehyde, mounted on glass slides, and viewed under a confocal microscope.

**Invasion Assay.** Growing cultures of HT-29 cells were infected with log-phase culture of Ty2 or Ty2Δ*t2544* ( $10^8$  cfu/mL) for 1 h at 37 °C. After vigorous washing, cultures were grown for 2 h in presence of gentamycin (200 μg/mL) to inhibit the growth of extracellular bacteria. Cells were lysed with 0.1% Triton X-100 and number of viable intracellular bacteria were determined by cfu count on LA plates with appropriate selection.

**Recombinant Protein Purification.** Recombinant N-terminally His-tagged T2544 protein was induced in *E. coli* BL21 (DE3) C41 transformed with the pET28a-t2544 constructs upon treatment with 1 mM isopropyl β-D-1-thiogalactopyranoside. Protein from insoluble inclusion bodies were recovered by solubilizing with 6M guanidine hydrochloride, purified by using Ni<sup>2+</sup>-NTA agarose (Qiagen), and refolded by dialysis. LPS contamination of the purified protein was found to be 0.1 EU/μg as determined by *Limulus ameobocyte* assay. Proper folding of recombinant protein was confirmed by spectrophotometric analysis at 340 nm. Further confirmation regarding refolding of protein was obtained by using naturally folded recombinant protein, which was affinity-purified by using Ni<sup>2+</sup>-NTA agarose in a low amount when produced in *E. coli* BL21(DE3)Plys S. Adhesion assays performed with naturally folded T2544 and refolded T2544 were identical.

**Preparation of Antiserum.** Male New Zealand White rabbits were injected intramuscularly with 100 μg of recombinant T2544 emulsified with Freund complete adjuvant followed by three booster doses of 150 μg of protein emulsified with incomplete Freund adjuvant administered at intervals of 7 d. The animals were bled 7 d after the last injection and antiserum was separated from the blood.

**Outer Membrane Fraction Preparation.** Overnight cultures of bacteria were harvested, washed with 20 mM Tris (pH 7.5), lysed by sonication after adding DNase (0.1 mg) and RNase (0.5 mg), and incubated at room temperature for 1 h. Unbroken cells were removed by centrifugation at 5,000 × *g* for 10 min. Membrane fractions were collected by centrifugation of the supernatant at 40,000 × *g* for 60 min at 4 °C and resuspended in 20 mM Tris containing 2% (wt/vol) sodium lauryl sarcosine. The mixture was incubated at room temperature for 30 min and the outer membrane fractions were collected by centrifugation as described earlier (3).

**Quantitative Analysis of Laminin Binding of T2544.**  $K_a$  of the equilibrium between T2544 and laminin was determined by Scatchard plot (4). Briefly, laminin-coated microtiter wells were incubated with increasing concentrations of purified T2544 at 37 °C followed by addition of RAS. Bound T2544 was determined as described in *Adhesion Assay* and a saturation–binding curve was generated. Free T2544 was obtained from the difference of the total and the bound protein. The  $K_a$  value was calculated by using GraphPad Prism software.

**In Vitro Bactericidal Assay.** Sera collected from typhoid and non-typhoid patients were preincubated with Ty2Δ*t2544* before use. A serial dilution of the heat-inactivated sera (50 μL) was prepared in a microtiter plate. Early log-phase culture (OD of 0.2 at 600 nm) of the target bacterial cells along with 25% guinea pig comple-









**Table S1. Systemic invasion of mice**

| Organ/DPI     | Mean difference in bacterial count log <sub>10</sub> values | t Statistic | Significance | 95% CI of difference |
|---------------|-------------------------------------------------------------|-------------|--------------|----------------------|
| <b>Blood</b>  |                                                             |             |              |                      |
| 2             | 0.59                                                        | 7.54        | <0.001       | 0.41–0.77            |
| 4             | 0.69                                                        | 17.14       | <0.001       | 0.59–0.78            |
| 6             | 0.69                                                        | 11.88       | <0.001       | 0.56–0.83            |
| <b>Liver</b>  |                                                             |             |              |                      |
| 2             | 0.42                                                        | 3.07        | <0.01        | 0.10–0.74            |
| 4             | 0.52                                                        | 5.09        | <0.001       | 0.28–0.76            |
| 6             | 0.43                                                        | 11.25       | <0.001       | 0.34–0.52            |
| <b>Spleen</b> |                                                             |             |              |                      |
| 2             | 0.80                                                        | 15.56       | <0.001       | 0.68–0.92            |
| 4             | 0.66                                                        | 10.03       | <0.001       | 0.51–0.82            |
| 6             | 0.78                                                        | 23.90       | <0.001       | 0.70–0.86            |

Unpaired t test results showing the significance of difference between the numbers of live organisms recovered from the blood, liver, and spleen of mice infected with Ty2 or Ty2Δt2544. DPI, days postinfection.

**Table S2. Opsonization assay**

| Opsonized with <i>S. Typhi</i> Ty2 | Mean ± SD, CFU × 10 <sup>4</sup> /well |             |            |             |
|------------------------------------|----------------------------------------|-------------|------------|-------------|
|                                    | 0 min                                  | 60 min      | 90 min     | 120 min     |
| T2544 antisera                     | 25.9 ± 5.7                             | 23.4 ± 5.07 | 42.3 ± 7.8 | 82.8 ± 11.6 |
| Preimmune sera                     | 20.5 ± 1.2                             | 93.4 ± 11.5 | 109 ± 11.2 | 110 ± 11    |
| t Statistic                        | 1.60                                   | 9.52        | 8.37       | 2.88        |
| Significance                       | NS                                     | <0.001      | <0.001     | NS          |

Unpaired t test results show significance of differences between numbers of live Ty2 recovered from mouse peritoneal macrophages after opsonization with preimmune or immune sera.

**Table S3. Bacterial strains used in this study**

| Strain name                           | Phenotype                 | Genotype         | Source     | Reference     |
|---------------------------------------|---------------------------|------------------|------------|---------------|
| <i>S. Typhi</i> Ty2                   | —                         | —                | Commercial | ATCC 700931   |
| <i>S. Typhi</i>                       | O9, 12, (Vi) Hd           | —                | Clinical   | 1             |
| <i>S. Paratyphi</i> A                 | O1, 2, 12, Ha:1, 5        | —                | Clinical   | 1             |
| <i>S. Typhimurium</i>                 | O1, 04, 05, Hi, 1, 2      | —                | Clinical   | Unpublished   |
| <i>S. Typhimurium</i> LT2             | —                         | —                | Commercial | ATCC 25870    |
| <i>Salmonella enteritidis</i>         | O1, 09, 12, Hg            | —                | Clinical   | Unpublished   |
| <i>Salmonella arizonae</i>            | 18, z4, z23, 2            | —                | Clinical   | Unpublished   |
| <i>Salmonella indica</i>              | 11, Hb, e, n, x           | —                | Clinical   | Unpublished   |
| ETEC (1)                              | O6:H16                    | LT+              | Clinical   | Unpublished   |
| ETEC (2)                              | OUT                       | LT+              | Clinical   | Unpublished   |
| ETEC (3)                              | OUT                       | LT+              | Clinical   | Unpublished   |
| EPEC (1)                              | O126                      | bfp+             | Clinical   | Unpublished   |
| EPEC (2)                              | O86                       | bfp+             | Clinical   | Unpublished   |
| EPEC (3)                              | O115                      | bfp+             | Clinical   | Unpublished   |
| <i>Shigella dysenteriae</i> type I    | Congo red (+), Sereny (+) | —                | Clinical   | 2             |
| <i>V. cholerae</i> (Eltor)            | Ogawa                     | Ctx(+),tcp(+)    | Clinical   | 3             |
| <i>V. cholerae</i> O139 Bengal (SG24) | —                         | Ctx(+),tcp(+)    | Clinical   | 3             |
| <i>S. Typhi</i> Ty2Δt2544             | —                         | t2544(-),PilS(+) | Laboratory | Present study |
| <i>S. Typhi</i> Ty2ΔpilS              | —                         | t2544(+),PilS(-) | Laboratory | Present study |
| <i>E. coli</i> BL21(DE3)              | —                         | —                | Commercial | Novagen 69387 |

OUT, O-untypable antigen.

- Dutta S, et al. (2006) Evaluation of new-generation serologic tests for the diagnosis of typhoid fever: data from a community-based surveillance in Calcutta, India. *Diagn Microbiol Infect Dis* 56:359–365.
- Pazhani GP, et al. (2004) Clonal multidrug-resistant *Shigella dysenteriae* type 1 strains associated with epidemic and sporadic dysenteries in eastern India. *Antimicrob Agents Chemother* 48:681–684.
- Saha PK, et al. (1996) Nontoxicogenic *Vibrio cholerae* O1 serotype Inaba biotype El Tor associated with a cluster of cases of cholera in southern India. *J Clin Microbiol* 34:1114–1117.

## Dataset S1.

### [Dataset S1](#)

Bioinformatic analysis and additional information. Sheet 1, Correspondence analysis of the putative adhesions/invasions. Sheet 2, Genes subjected to correspondence analysis. Sheet 3, Functionally annotated genes in the PAI of *S. Typhi*. Sheet 4, Putative/hypothetical genes in the PAIs. Sheet 5, Secretion-related proteins. Sheet 6, Cytoplasmic proteins. Sheet 7, Transcriptional regulator. Sheet 8, Adhesion/invasion-related protein. Sheet 9, Effector proteins. Sheet 10, Transporters. Sheet 11, Metabolic protein. Sheet 12, Inner membrane protein. Sheet 13, Other genes. Sheet 14, Patient data. Sheet 15, Primers used in this study. Sheet 16, sIgA and bacterial count in the feces of immunized mice challenged with Ty2. Sheet 17, Detailed statistical analysis for [Figs. S2A, 1](#) and [S4B, 3](#).
